# Supplementary material for: Inference of neuronal functional circuitry with spike-triggered non-negative matrix factorization
Source: Springer Nature journal article supplement (doi:10.1038/s41467-017-00156-9), 2017-07-20
Supplement: MOESM1 [file 41467_2017_156_MOESM1_ESM.pdf]

File Name: Supplementary Information

Description: Supplementary Figures and Supplementary References

File Name: Peer Review File

Description:

# Supplementary Figure 1

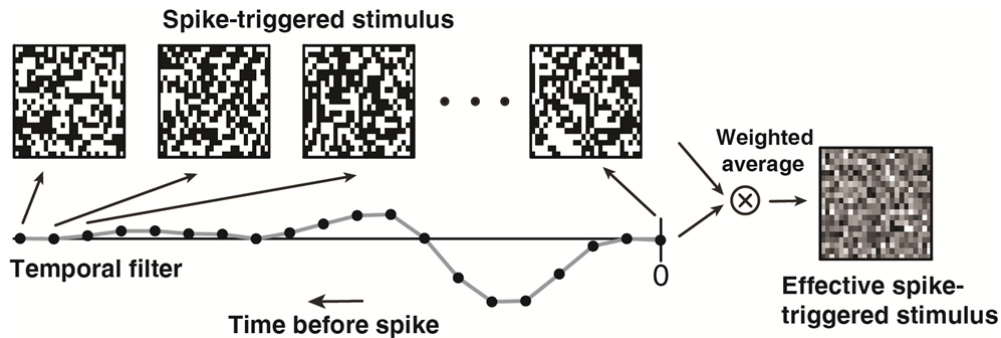

**Supplementary Figure 1. Computation of effective spike-triggered stimuli.** Each spike-triggered stimulus under spatiotemporal white-noise stimulation is a brief sequence of black-white binary spatial patterns. To integrate out time, the cell's temporal filter, obtained from the spike-triggered average (STA), is used as a set of weights to compute a weighted average of the frames from the spike-triggered stimulus. The weighted average can be thought of as computing for each pixel the scalar product between the temporal filter and the sequence of contrast values. This yields the effective spike-triggered stimulus, a spatial pattern with greyscale pixel values.

13

## Supplementary Figure 2

14

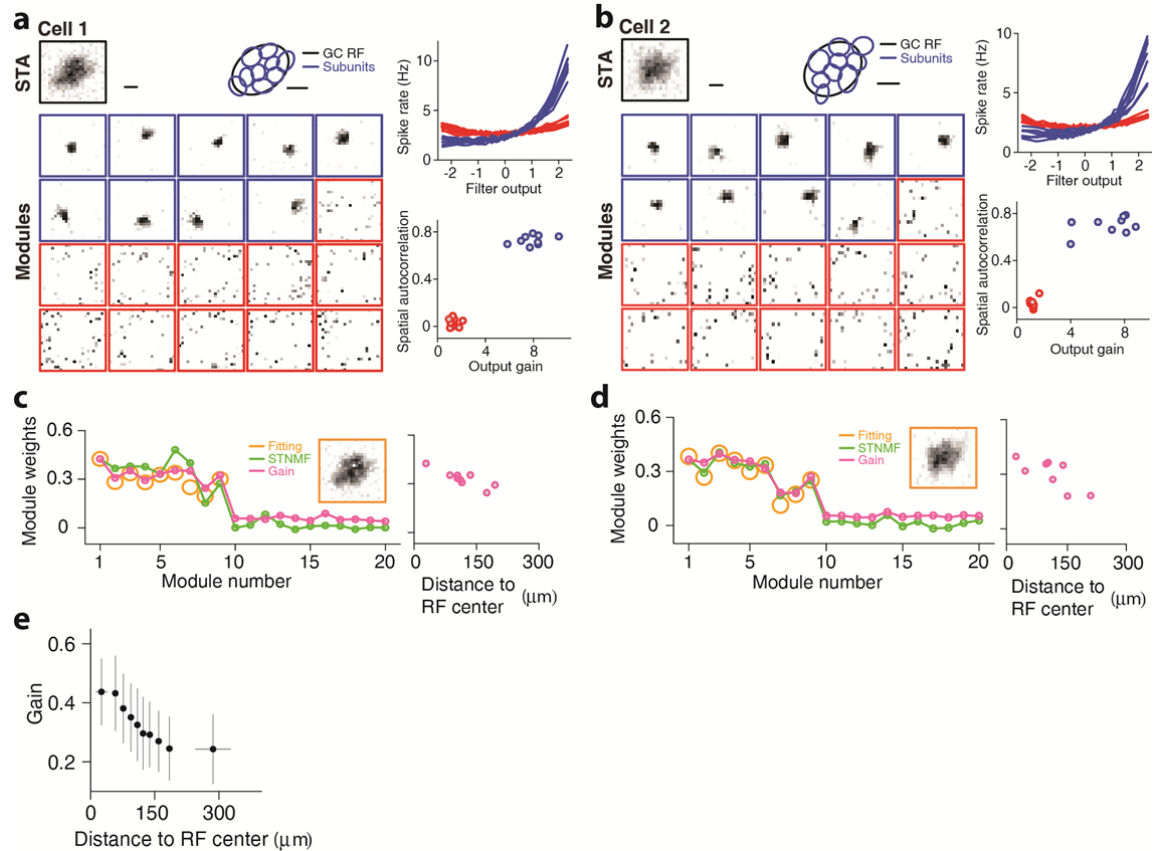

15

16 **Supplementary Figure 2. Additional examples for the application of STNMF to salamander**  
 17 **ganglion cells and analysis of subunit weights. a,b,** Subunit analysis of two more sample ganglion  
 18 cells, analogous to Fig. 1b-d. Scale bars, 100  $\mu\text{m}$ . **c,d,** Module weights according to the computed  
 19 normalized output gain (magenta), according to the average NMF weights (green), and according to a  
 20 fit of the spatial receptive field with the detected subunits (orange circles; the inset shows the receptive  
 21 field as recovered from the fit). Data correspond to the two sample cells shown in (a) and (b). The  
 22 STNMF weights have arbitrary scale and were here normalized so that, for the first subunit, the value  
 23 is the same value as the normalized output gain. The subunits are ordered according to their spatial  
 24 autocorrelation, from largest to smallest. On the right, the dependence of the normalized output gain  
 25 on the subunit's distance from the receptive field center is shown. This distance was determined as the  
 26 distance between the center points of the Gaussian fits. **e,** Average of the dependence of the  
 27 normalized output gain on the distance from the receptive field center. We determined the subunits  
 28 and their output gain for 102 ganglion cells from a single retina ( $N=824$  subunits) and binned them  
 29 into ten bins according to the distance from the corresponding receptive field center, so that each bin  
 30 contained about the same number of subunits. The data show the average normalized output gain and  
 31 distance for each bin, and error bars correspond to standard deviations.

32

## Supplementary Figure 3

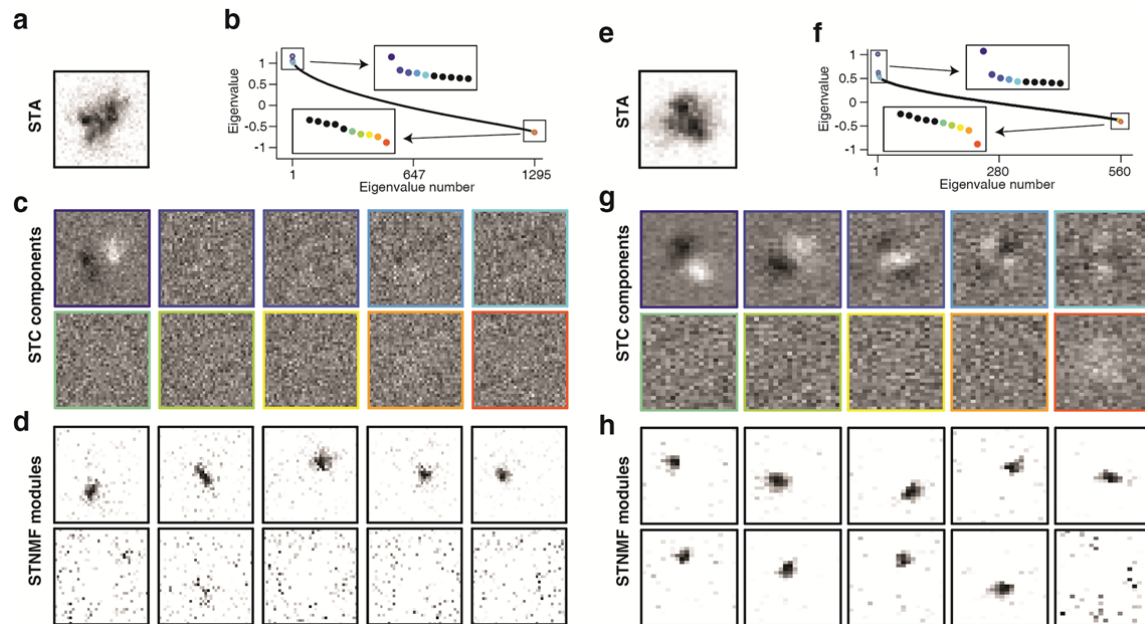

### Supplementary Figure 3. Comparison of STNMF and spike-triggered covariance (STC) analysis.

We performed STC analysis on the effective spike-triggered stimulus ensembles for individual ganglion cells, using the same spatial region around the receptive field center as for the STNMF analysis. The analysis was performed by computing the covariance matrix of the pixel values across the effective spike-triggered stimulus ensemble and subtracting the prior covariance matrix, which is here given by the identity matrix. We then performed an eigenvalue analysis of this matrix difference. Note that, despite the binary distribution of pixel values in the original stimulus, STC analysis is possible because, owing to the central limit theorem, the temporal weighted averaging yields, to good approximation, normal distributions of pixel values in the effective spike-triggered stimulus ensemble.

**a**, Spatial receptive field of a sample cell, obtained as the STA of the effective spike-triggered stimulus ensemble. **b**, Eigenvalue spectrum. Insets show a zoomed-in view of the largest 10 and smallest 10 eigenvalues. Note that there is a broad, continuous distribution of eigenvalues, so that, except for the largest eigenvalue, distinct eigenvalues that signify relevant stimulus features cannot be extracted. This is caused by the high dimensionality of the analyzed stimulus space (here more than 1,000 dimensions), despite the fact that a total of about 9,500 spikes were analyzed. The high dimensionality is necessary to provide sufficient resolution for detecting subunits inside the receptive field.

**c**, Eigenvectors corresponding to the largest five eigenvalues (top row) and to the smallest five eigenvalues. Here, white and black pixels stand for positive and negative values, respectively.

**d**, Modules extracted by the STNMF analysis for the same cell. Only the ten modules with the largest spatial autocorrelation are shown. **e-h**, Same as (**a-d**), but for a different sample cell. Here, the STC analysis showed several structured features, though, as opposed to the subunits from the STNMF analysis, not localized in space. About 20,000 spikes analyzed.

# Supplementary Figure 4

60

61

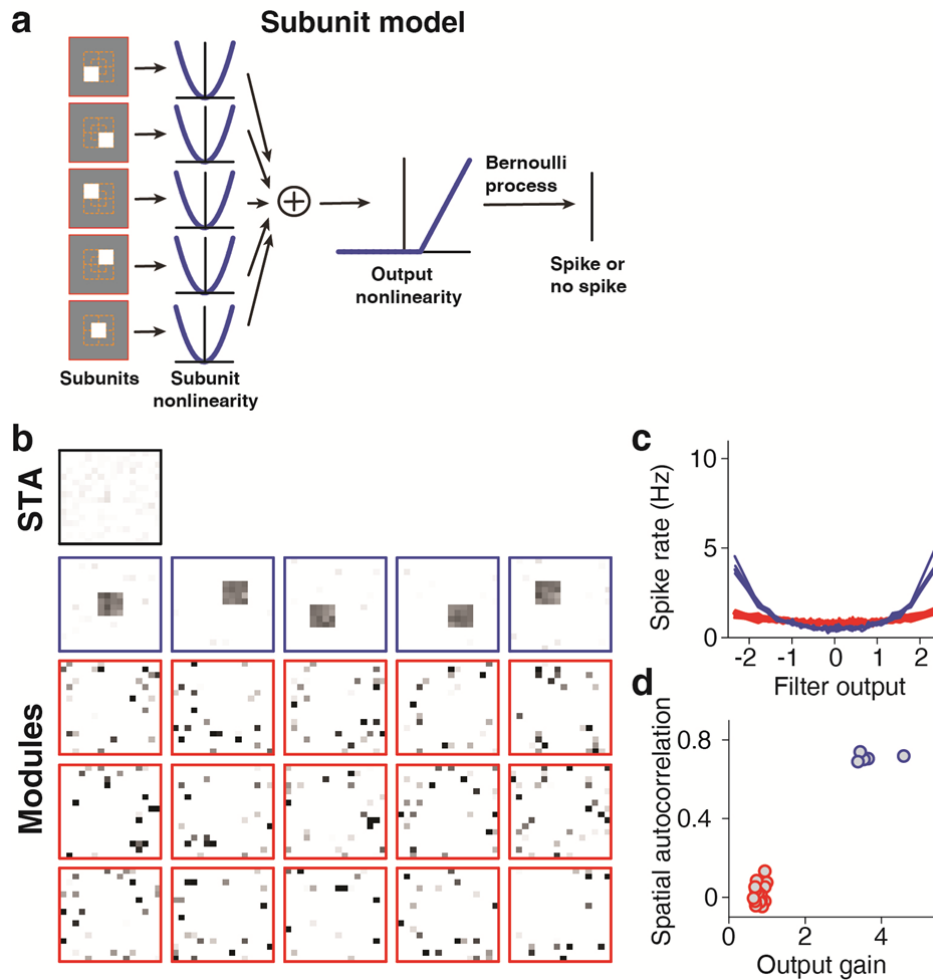

62

63 **Supplementary Figure 4. Identification of subunits with STNMF for a ganglion cell model with**  
 64 **quadratic subunit nonlinearities.** **a**, Model structure. Spatial patterns of 16x16 pixels of Gaussian  
 65 white noise were used as a stimulus. The model contained five subunits with the same layout as in  
 66 Fig. 2. For the subunit nonlinearity, however, we here used a symmetric squaring operation. As for the  
 67 model in Fig. 2, the summed subunit signal then went through a threshold-linear output nonlinearity,  
 68 and spikes were determined according to a Bernoulli process. **b-d**, STNMF analysis of simulated data  
 69 as in Fig. 2b-d, using around 3,000 spikes.

70

71

# Supplementary Figure 5

72

73

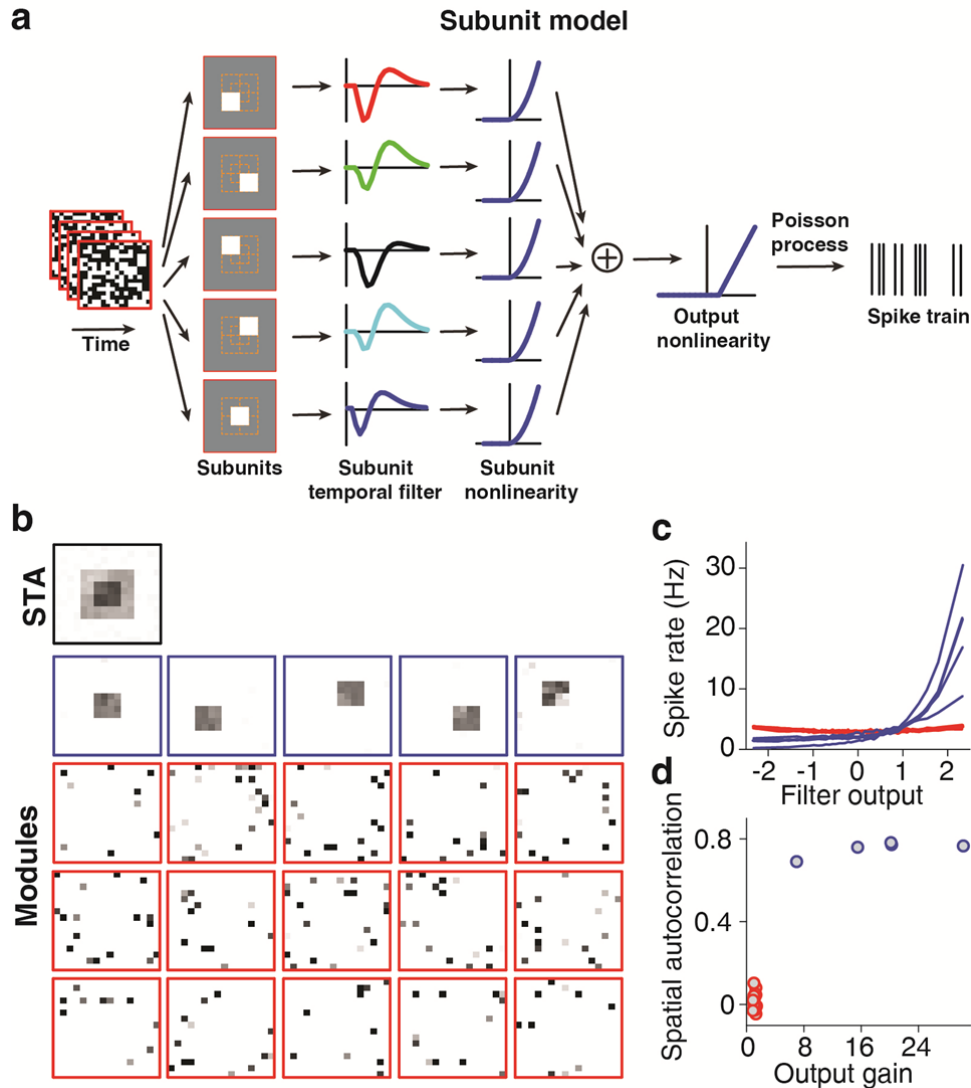

74

75 **Supplementary Figure 5. Identification of subunits with STNMF for a ganglion cell model with**  
 76 **different temporal filters for the subunits.** **a**, Model structure. Binary spatiotemporal white noise  
 77 with 16x16 pixels was used as a stimulus. The model contained five overlapping subunits as in Fig. 2,  
 78 each with a different Off-type temporal filter as shown in the plot. As for the model in Fig. 2, each  
 79 subunit signal is transformed by a threshold-quadratic subunit nonlinearity before summation and  
 80 application of a threshold-linear output nonlinearity. Spikes were determined according to a Poisson  
 81 process. **b-d**, STNMF analysis of simulated data as in Fig. 2b-d, using around 6,800 spikes.

82

83

84

## Supplementary Figure 6

85

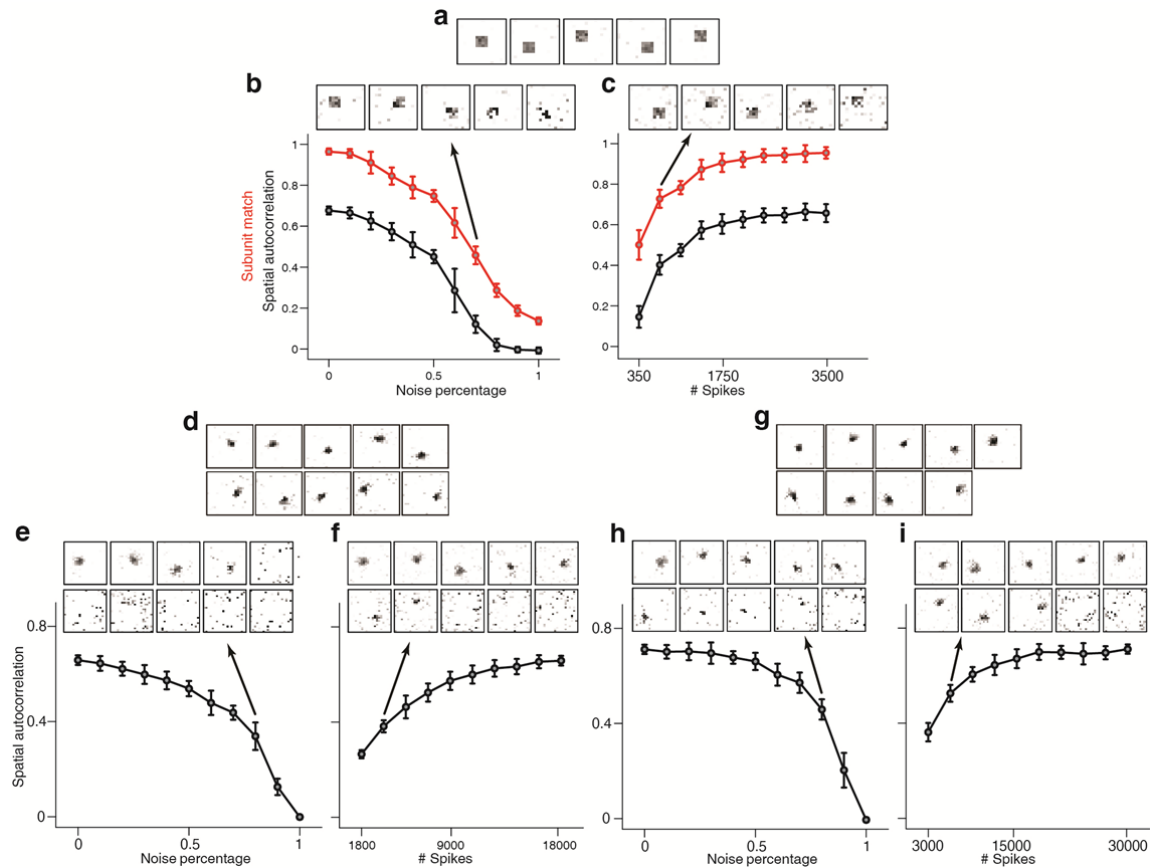

86

87 **Supplementary Figure 6. Analysis of robustness of subunit reconstruction with respect to noise**  
 88 **and number of spikes.** **a**, Reconstructed subunits of the model used in Fig. 2, taking all simulated  
 89 spikes into account. **b**, Effect of noise, simulated by randomly replacing a fraction of the simulated  
 90 model spikes (quantified as the “noise percentage”) with spikes at random times. Subunit  
 91 reconstruction was quantified by the average correlation value between the true subunit and the best  
 92 matching reconstructed subunit (red) as well as by the average spatial autocorrelation of the five most  
 93 localized reconstructed subunits (black). Data points and error bars show mean values and standard  
 94 deviations obtained over 20 repeats of the analysis. The set of subunits on top of the graph shows a  
 95 sample reconstruction from the noise level indicated by the arrow. **c**, Dependence of subunit  
 96 reconstruction on available spike number. Limited data sets of specified size were obtained by  
 97 randomly selecting subsets of the simulated model spikes. Performance of subunit reconstruction was  
 98 assessed in the same way as in **(b)**. **d-f** and **g-i**, Analysis of the effect of noise and spike number for  
 99 two sample ganglion cells. Performance was assessed, as for the model cell, by the average spatial  
 100 autocorrelation, taking into account as many reconstructed modules as the number of subunits found  
 101 for the true data set. Data points and error bars show mean values and standard deviations obtained  
 102 over 20 repeats of the analysis.

103

104

## Supplementary Figure 7

105

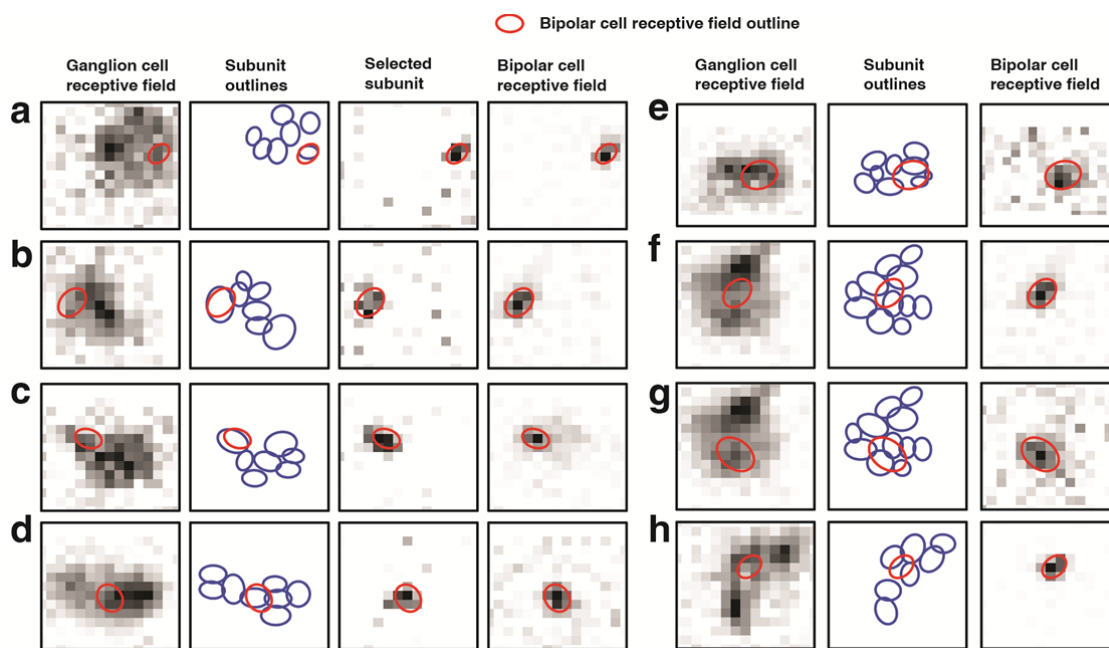

106

107 **Supplementary Figure 7. Further examples of comparison between recorded bipolar cell**  
 108 **receptive fields and extracted ganglion cell subunits. a-d**, Four additional examples of bipolar cell-  
 109 ganglion cell pairs with good matches between the bipolar cell receptive field and one of the  
 110 reconstructed subunits, shown in the same style as in Fig. 3. **e-h**, Four examples of bipolar cell-  
 111 ganglion cell pairs for which no subunit matched the bipolar cell receptive field, shown as in (a-d), but  
 112 without a selected subunit. The bipolar cells in (a) and (e) are the same as in the bottom row and last-  
 113 to-bottom row, respectively, of Fig. 3, but shown here in comparison to different ganglion cells. (b)  
 114 and (f) show the same bipolar cell, once in comparison to a ganglion cell with a matching subunit (b)  
 115 and once in comparison to a ganglion cell with no matching subunit (f). (g) and (h) show bipolar cells  
 116 for which no match with any subunit of any recorded ganglion cell was found. Scale bar, 100  $\mu\text{m}$ .

117

118



## Supplementary Figure 8

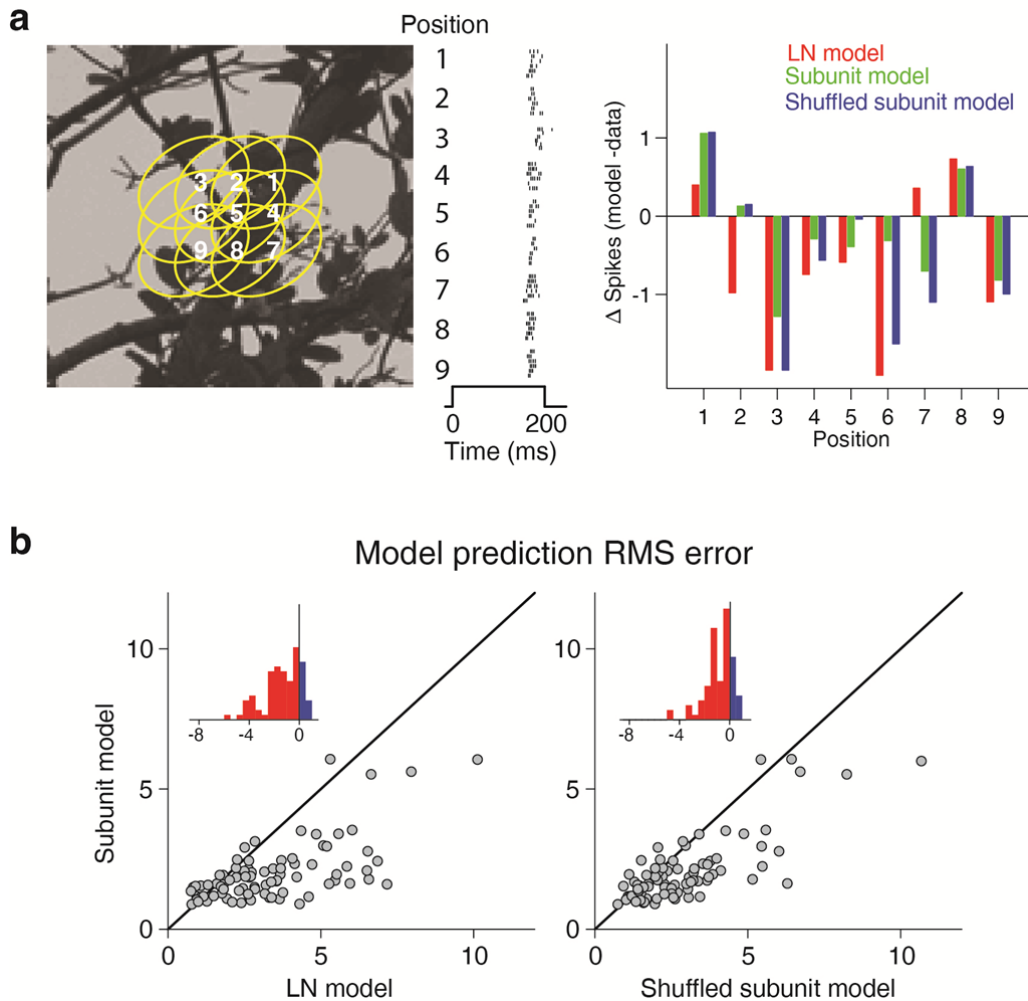

120

121 **Supplementary Figure 8. Analysis of response predictions with fine-scale shifted natural images.**  
 122 **a**, Responses of a sample ganglion cell. Left: Example of a natural image with receptive field of a  
 123 ganglion cell at nine positions (ellipses with numbers in the centers), corresponding to the nine slightly  
 124 shifted presentations of the same image. Center: Raster plots of responses from the sample cell for  
 125 repeated presentations of the image at the nine positions. Right: Deviations of the three model  
 126 predictions from the measured mean spike count for each of the nine image positions for the sample  
 127 cell. The LN model (red), the subunit model (green), and the shuffled subunit model (blue) were  
 128 similar to the ones used in Fig. 4 in the main text, except that the output nonlinearity was another half-  
 129 wave rectification (as also used for the subunit nonlinearity), with the slope left as a free parameter,  
 130 optimized for each model by minimizing the root-mean-square (RMS) error between the data and the  
 131 prediction. **b**, Comparison of RMS error for the different models. Each data point corresponds to a  
 132 different combination of analyzed ganglion cell and presented natural image, coming from a total of  
 133 eleven ganglion cells and ten images from three retinas. Insets show histograms of differences in RMS  
 134 error. The subunit model generally yielded smaller error values than both the LN model and the  
 135 shuffled subunit model. Differences between the subunit model and the other two models are  
 136 significant ( $p < 10^{-8}$  in both cases; Wilcoxon signed-rank test).

137

138

## Supplementary Figure 9

139

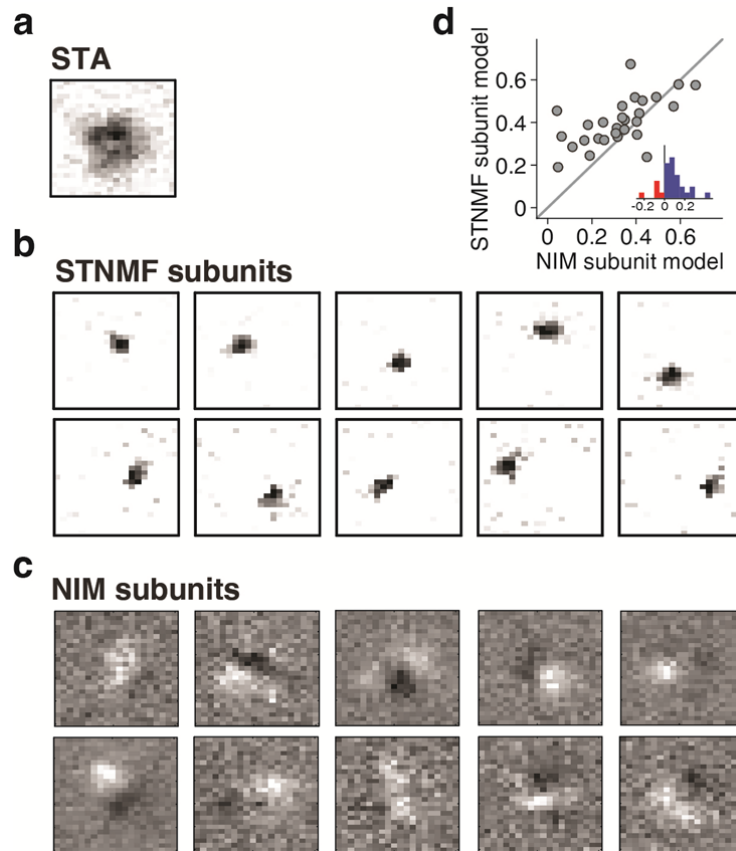

140

141 **Supplementary Figure 9. Comparison of STNMF with the Nonlinear Input Model (NIM)<sup>1</sup>.**  
142 **a**, Spatial receptive field for a sample ganglion cell (same cell as in Fig. 1b-d). **b**, Subunits of the  
143 sample cell identified by STNMF. **c**, Subunits obtained from fitting a reduced NIM to the same sample  
144 cell. Here, black and white pixels stand for positive and negative values, respectively. **d**, Comparison  
145 of response predictions of subunit models with subunits derived from either STNMF or from the  
146 reduced NIM fit for the same 28 cells as in Fig. 4c. The analysis was conducted on the recordings  
147 under spatiotemporal white-noise stimulation, and performance was measured as the variance  
148 explained on the held-out frozen-noise sections. The obtained variance explained was here  
149 significantly higher for the STNMF subunit model ( $p=0.0023$ ; Wilcoxon signed-rank test).

150

151

152

## Supplementary Figure 10

153

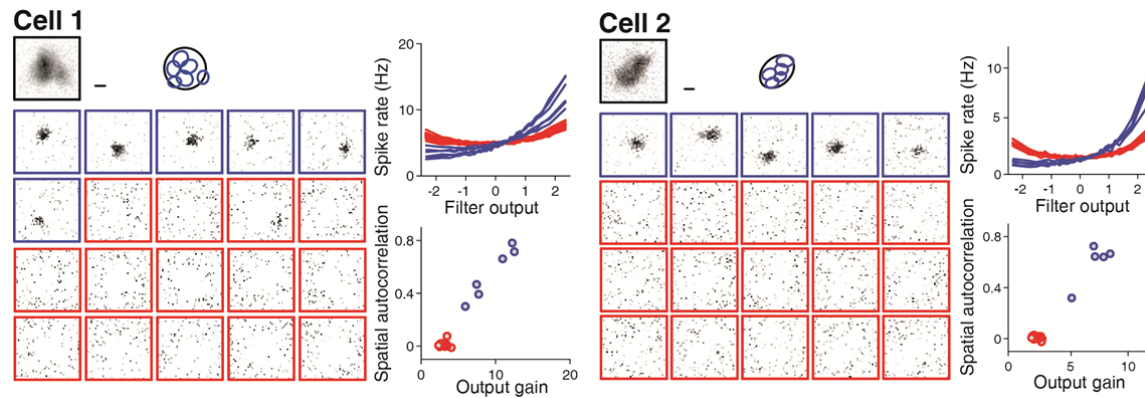

154

155 **Supplementary Figure 10. Sample application of STNMF to ganglion cell recordings from**  
 156 **mouse retina.** Reconstructions of subunits from two recorded mouse retinal ganglion cells are shown  
 157 as in Fig. 1b-d. Scale bars, 100  $\mu\text{m}$ . The applied visual stimulus here was spatiotemporal white noise  
 158 with a temporal update rate of 15 Hz and a pixel size of 15  $\mu\text{m}$  x 15  $\mu\text{m}$ , half as wide as applied for the  
 159 recordings from salamander retina. The STNMF method was applied in the same fashion as for the  
 160 analysis of salamander retinal ganglion cells without any further adjustments or tuning of parameters.  
 161 Like for the salamander data, STNMF revealed a small number of localized subunits, whose filter  
 162 output is systematically related to the cell's spiking activity. The extracted subunits could correspond  
 163 to individual presynaptic bipolar cells. Alternatively, they could represent groups of bipolar cells, in  
 164 particular since bipolar cells in mouse retina can be coupled by gap junctions, which has been shown  
 165 to lead to an enlargement of the spatial scale of nonlinear integration<sup>2</sup>.

166

167

### 168 Supplementary References

- 169 1. McFarland, J. M., Cui, Y. & Butts, D. A. Inferring nonlinear neuronal computation based  
 170 on physiologically plausible inputs. *PLoS Comput Biol* **9**, e1003143 (2013).  
 171 2. Kuo, S. P., Schwartz, G. W. & Rieke, F. Nonlinear spatiotemporal integration by electrical  
 172 and chemical synapses in the retina. *Neuron* **90**, 320-332 (2016).

173
